# Supplementary material
Source: PubMed Central journal article supplement (PMC3133024)
Supplement: supp_193_8_1943__1.pdf [file supp_193_8_1943__1.pdf]

**Table P1.** Primers used for mutant complementation using vector pBAD33-Gm

| <b>Name</b>                                                                                                                                                                                | <b>5' Composition 3'</b>                 |
|--------------------------------------------------------------------------------------------------------------------------------------------------------------------------------------------|------------------------------------------|
| - To obtain pBAD33-WecP <sub>Ah</sub>                                                                                                                                                      |                                          |
| A3-Wec-for                                                                                                                                                                                 | 5'- <b>GGAATTCAAAGTCTTGGTCATTTGC</b> -3' |
| A3-Wec-rev                                                                                                                                                                                 | -GCTCTAGATTTCTTCCCAAAGCGATTA-            |
| Primers contain <i>EcoRI</i> (bold) and <i>XbaI</i> (double underlined), the PCR amplified product was ligated to <i>EcoRI-SmaI</i> digested pBAD33-Gm                                     |                                          |
| - To obtain pBAD33-WecA <sub>Ec</sub>                                                                                                                                                      |                                          |
| WecA-coli-for                                                                                                                                                                              | -TCCCCCGGGCGGACTTTCCTTCTGAAT-            |
| WecA-coli-rev                                                                                                                                                                              | -GCTCTAGACCCACAAGGTACGAAACAA-            |
| - To obtain pBAD33-WabP <sub>Se</sub>                                                                                                                                                      |                                          |
| WbaP-salmo-for                                                                                                                                                                             | -TCCCCCGGGAACGATGCTTGCTGTAAAAA-          |
| WbaP-salmo-rev                                                                                                                                                                             | -GCTCTAGACATGGCAGGTTAAAGGTGA-            |
| Primers contain <i>SmaI</i> (underlined) and <i>XbaI</i> (double underlined), the PCR amplified product was ligated to <i>XbaI-SmaI</i> digested pBAD33-Gm                                 |                                          |
| - To obtain pBAD33-WecA <sub>Kp</sub>                                                                                                                                                      |                                          |
| 52145wecA-A                                                                                                                                                                                | -GAAGATCTGTATAATGGCGCCGGATAG-            |
| 52145wecA-D                                                                                                                                                                                | -GAAGATCTCGACTATCCAGCCTTTTCC-            |
| Primers contain <i>BglII</i> (double underlined), the PCR amplified product was ligated to <i>SmaI</i> digested pBAD33-Gm and the right fragment orientation by DNA sequence determination |                                          |
